# Supplementary material for: Graphene as Nanocarrier for Gold(I)-Monocarbene Complexes: Strength and Nature of Physisorption
Source: MDPI journal article supplement (doi:10.3390/molecules28093941), 2023-05-07
Supplement: s1 [file s1]

# Supplementary Material

## Graphene as Nanocarrier for Gold(I)-Monocarbene Complexes: Strength and Nature of Physisorption

Cahit Orek<sup>1</sup>, Massimiliano Bartolomei<sup>2</sup>, Cecilia Coletti<sup>3</sup> and Niyazi Bulut<sup>1</sup>

1 Department of Physics, Faculty of Science, Firat University, Elazig 23119, Turkey

2 Instituto de Fisica Fundamental, Consejo Superior de Investigaciones Cientificas (IFF-CSIC), Serrano 123, 28006 Madrid, Spain

3 Dipartimento di Farmacia, Università degli Studi "G. d'Annunzio" Chieti-Pescara, Via dei Vestini, 66100 Chieti, Italy

**Table. S1** Interaction energies between IMeAuCl - C<sub>37</sub>H<sub>16</sub> as a function of the distance R between their centers of mass. All values are corrected for the basis set superposition error (BSSE).

| R (Å) | Energy (meV) |              |                            |                       |                              |
|-------|--------------|--------------|----------------------------|-----------------------|------------------------------|
|       | MP2C/CBS     | DFT-SAPT/CBS | PBE-D3(BJ)/6-311++G(2p,2d) | M062X/6-311++G(2p,2d) | B3LYP-D3(BJ)/6-311++G(2p,2d) |
| 2.5   | 2875         | 2591         | 2969                       | 3288                  | 3075                         |
| 2.75  | 507          | 626          | 734                        | 735                   | 572                          |
| 3.0   | -326         | -250         | -257                       | -343                  | -503                         |
| 3.25  | -703         | -616         | -622                       | -670                  | -856                         |
| 3.5   | -774         | -679         | -694                       | -656                  | -879                         |
| 3.75  | -676         | -615         | -643                       | -521                  | -772                         |
| 4.0   | -554         | -512         | -550                       | -376                  | -632                         |
| 4.25  | -440         | -410         | -453                       | -262                  | -501                         |
| 4.5   | -346         | -329         | -366                       | -182                  | -392                         |
| 4.75  | -271         | -260         | -292                       | -128                  | -306                         |
| 5.0   | -214         | -205         | -232                       | -93                   | -241                         |

|      |      |      |      |     |      |
|------|------|------|------|-----|------|
| 5.25 | -169 | -162 | -183 | -68 | -190 |
| 5.5  | -135 | -131 | -145 | -49 | -151 |
| 5.75 | -109 | -104 | -114 | -35 | -121 |
| 6.0  | -88  | -84  | -91  | -24 | -98  |
| 6.25 | -72  | -67  | -72  | -17 | -78  |
| 6.5  | -59  | -57  | -58  | -11 | -64  |
| 6.75 | -49  | -45  | -46  | -7  | -52  |
| 7.0  | -41  | -39  | -37  | -5  | -42  |
| 7.25 | -33  | -31  | -30  | -3  | -34  |
| 7.5  | -28  | -26  | -24  | -1  | -28  |
| 7.75 | -23  |      | -20  | 0   | -23  |
| 8.0  | -20  |      | -16  | 1   | -18  |

**Table S2.** Physical contributions to the total interaction energy as a function of the distance R between the centers of mass of IMeAuCl and C<sub>37</sub>H<sub>16</sub> calculated at the DFT-SAPT/CBS level of theory. All values are in meV.

| R    | Electr.  | Exch.    | Ind.     | Disp.<br>(Ed*f) <sup>1</sup> | $\delta$ HF | Total   |
|------|----------|----------|----------|------------------------------|-------------|---------|
| 2.50 | -6333.19 | 14126.86 | -1388.80 | -4628.11                     | 65.12       | 2590.93 |
| 2.75 | -3101.15 | 7004.94  | -620.94  | -3226.49                     | 47.29       | 625.85  |
| 3.00 | -1511.49 | 3447.02  | -312.58  | -2282.59                     | 40.08       | -250.29 |
| 3.25 | -733.29  | 1686.04  | -184.36  | -1633.13                     | -15.52      | -616.06 |
| 3.50 | -353.58  | 820.17   | -126.37  | -1181.10                     | -29.71      | -679.43 |
| 3.75 | -168.74  | 398.35   | -95.64   | -862.88                      | -25.96      | -615.28 |
| 4.00 | -79.18   | 192.33   | -76.04   | -637.95                      | -14.11      | -511.74 |

|      |        |       |        |         |       |         |
|------|--------|-------|--------|---------|-------|---------|
| 4.25 | -35.46 | 93.32 | -61.79 | -476.54 | -7.10 | -410.48 |
| 4.50 | -14.26 | 44.59 | -50.83 | -360.42 | -6.20 | -328.81 |
| 4.75 | -3.79  | 22.06 | -41.94 | -275.86 | -4.81 | -259.71 |
| 5.00 | 1.40   | 10.81 | -34.74 | -213.69 | -3.74 | -205.39 |
| 5.25 | 3.84   | 5.52  | -28.98 | -167.24 | -2.35 | -162.15 |
| 5.50 | 5.07   | 2.51  | -24.31 | -132.34 | -3.06 | -130.72 |
| 5.75 | 5.65   | 1.05  | -20.51 | -105.71 | -1.86 | -104.28 |
| 6.00 | 5.95   | 0.62  | -17.36 | -85.30  | -2.10 | -84.39  |
| 6.25 | 6.05   | 1.45  | -14.72 | -69.42  | -1.84 | -67.25  |
| 6.50 | 6.02   | 1.13  | -12.56 | -56.93  | -3.68 | -56.81  |
| 6.75 | 5.93   | 0.05  | -10.77 | -47.03  | -0.96 | -45.17  |
| 7.00 | 5.82   | 0.22  | -9.26  | -39.13  | -2.5  | -38.52  |
| 7.25 | 5.68   | 0.33  | -8.01  | -32.76  | -1.57 | -31.03  |
| 7.50 | 5.52   | 1.34  | -6.93  | -27.58  | -2.54 | -25.73  |

<sup>1</sup>E<sub>d</sub> value was multiplied by a factor of 1.1931

## Cartesian Coordinates of the structures in Figure 5

### C<sub>37</sub>H<sub>16</sub> – IMeAuCl

70

|   |          |          |          |
|---|----------|----------|----------|
| C | -1.39682 | 0.21224  | -0.17447 |
| C | -0.87902 | -1.11286 | -0.12381 |
| C | 0.51692  | -1.32511 | 0.05713  |
| C | 1.39687  | -0.21221 | 0.17443  |
| C | 0.88040  | 1.11298  | 0.11283  |
| C | -0.51831 | 1.32506  | -0.04618 |
| C | -1.03673 | 2.65583  | -0.10943 |
| C | -2.43628 | 2.86659  | -0.26919 |
| C | -3.31651 | 1.75163  | -0.39752 |
| C | -2.80135 | 0.42522  | -0.33460 |
| C | -3.67940 | -0.68913 | -0.46102 |
| C | -3.16069 | -2.01681 | -0.40962 |
| C | -1.76389 | -2.23062 | -0.23092 |
| C | -1.24322 | -3.55575 | -0.19070 |
| C | 0.15548  | -3.76843 | -0.00960 |
| C | 1.03819  | -2.65574 | 0.09736  |
| C | 2.43544  | -2.86666 | 0.27601  |
| C | 3.31692  | -1.75156 | 0.39429  |
| C | 2.80136  | -0.42516 | 0.33464  |
| C | 3.67900  | 0.68914  | 0.46429  |
| C | 3.16154  | 2.01686  | 0.40280  |
| C | 1.76247  | 2.23050  | 0.24302  |
| C | 1.24424  | 3.55573  | 0.18195  |
| C | -0.15657 | 3.76833  | 0.01834  |
| C | -0.68265 | 5.10206  | -0.03884 |
| C | -2.06555 | 5.28812  | -0.20769 |
| C | -2.95244 | 4.20419  | -0.32626 |
| C | -4.36730 | 4.38160  | -0.49850 |
| C | -5.21424 | 3.31024  | -0.61189 |
| C | -4.72644 | 1.96018  | -0.56337 |
| C | -5.57645 | 0.84675  | -0.67858 |
| C | -5.08729 | -0.47005 | -0.63045 |
| C | 4.04344  | 3.14187  | 0.52717  |
| C | 3.51052  | 4.44137  | 0.47373  |
| C | 2.13457  | 4.67422  | 0.30624  |
| C | 1.57836  | 5.99723  | 0.24916  |
| C | 0.23333  | 6.20149  | 0.08442  |
| H | -2.46317 | 6.30670  | -0.24956 |
| H | -0.16820 | 7.21760  | 0.04344  |
| H | -4.76068 | 5.40093  | -0.53860 |
| H | -6.28817 | 3.46885  | -0.74191 |
| H | -6.65075 | 1.00980  | -0.80759 |
| H | 4.18646  | 5.29681  | 0.56688  |
| H | 2.25733  | 6.84924  | 0.34119  |
| H | 5.09482  | 2.99323  | 0.65911  |
| H | 4.18046  | 0.58869  | 1.40415  |

|    |          |          |          |
|----|----------|----------|----------|
| H  | 4.36641  | -1.91162 | 0.52795  |
| H  | 2.82416  | -3.86251 | 0.32162  |
| H  | 0.54195  | -4.76466 | 0.04592  |
| H  | -1.90189 | -4.39235 | -0.29637 |
| H  | -3.82149 | -2.85293 | -0.50535 |
| H  | -5.75716 | -1.29969 | -0.71915 |
| H  | 4.41678  | 0.60155  | -0.30572 |
| Au | -3.24098 | 1.65009  | 3.10974  |
| Cl | -5.51910 | 1.99747  | 2.96653  |
| N  | -0.29876 | 2.29210  | 3.37633  |
| N  | -0.62055 | 0.15695  | 3.31833  |
| C  | -1.28207 | 1.35066  | 3.26662  |
| C  | 0.94651  | 1.69792  | 3.50049  |
| C  | 0.74343  | 0.35050  | 3.46388  |
| C  | -0.53726 | 3.72995  | 3.40499  |
| C  | -1.27250 | -1.14609 | 3.27224  |
| H  | 1.85871  | 2.27687  | 3.56382  |
| H  | -2.25844 | -1.01934 | 2.81369  |
| H  | -0.67253 | -1.83401 | 2.66662  |
| H  | 1.44423  | -0.47390 | 3.48860  |
| H  | -1.39370 | -1.54783 | 4.28638  |
| H  | -0.54385 | 4.09482  | 4.44008  |
| H  | -1.51237 | 3.92455  | 2.94702  |
| H  | 0.24454  | 4.24145  | 2.83299  |

# **C<sub>54</sub>H<sub>18</sub> – IMeAuCl**

89

|   |          |          |          |
|---|----------|----------|----------|
| C | -1.38630 | 0.21110  | -0.16911 |
| C | -0.87280 | -1.10320 | -0.11870 |
| C | 0.51300  | -1.31340 | 0.04990  |
| C | 1.38516  | -0.20952 | 0.16820  |
| C | 0.87192  | 1.10485  | 0.11630  |
| C | -0.51402 | 1.31510  | -0.05239 |
| C | -1.02710 | 2.62980  | -0.10420 |
| C | -2.41350 | 2.84130  | -0.27190 |
| C | -3.28710 | 1.73570  | -0.38710 |
| C | -2.77240 | 0.42120  | -0.33630 |
| C | -3.64580 | -0.68320 | -0.45280 |
| C | -3.13160 | -1.99880 | -0.40350 |
| C | -1.74500 | -2.20760 | -0.23650 |
| C | -1.23190 | -3.52270 | -0.18680 |
| C | 0.15540  | -3.73280 | -0.01860 |
| C | 1.02680  | -2.62770 | 0.10030  |
| C | 2.41270  | -2.83940 | 0.27020  |
| C | 3.28540  | -1.73460 | 0.39030  |
| C | 2.77100  | -0.42010 | 0.33840  |
| C | 3.64480  | 0.68300  | 0.45730  |
| C | 3.13160  | 1.99860  | 0.40380  |

|    |          |          |          |
|----|----------|----------|----------|
| C  | 1.74504  | 2.20827  | 0.23321  |
| C  | 1.23300  | 3.52350  | 0.18019  |
| C  | -0.15450 | 3.73460  | 0.01150  |
| C  | -0.66740 | 5.04890  | -0.04100 |
| C  | -2.04680 | 5.24250  | -0.20840 |
| C  | -2.92650 | 4.15570  | -0.32410 |
| C  | -4.30530 | 4.34800  | -0.49020 |
| C  | -5.16870 | 3.25560  | -0.60300 |
| C  | -4.67330 | 1.94510  | -0.55330 |
| C  | -5.52730 | 0.83780  | -0.66620 |
| C  | -5.03180 | -0.47350 | -0.61830 |
| C  | -5.88600 | -1.57940 | -0.73210 |
| C  | -5.37770 | -2.87940 | -0.68430 |
| C  | -4.00360 | -3.10310 | -0.52060 |
| C  | -3.47820 | -4.40250 | -0.47010 |
| C  | -2.10380 | -4.62660 | -0.30470 |
| C  | -1.57960 | -5.92560 | -0.25390 |
| C  | -0.20850 | -6.13330 | -0.08820 |
| C  | 0.66910  | -5.04680 | 0.03100  |
| C  | 2.04770  | -5.24020 | 0.19960  |
| C  | 2.92600  | -4.15380 | 0.32050  |
| C  | 4.30350  | -4.34800 | 0.49100  |
| C  | 5.16590  | -3.25610 | 0.61060  |
| C  | 4.67050  | -1.94560 | 0.56160  |
| C  | 5.52460  | -0.83960 | 0.67940  |
| C  | 5.03000  | 0.47180  | 0.62960  |
| C  | 5.88460  | 1.57650  | 0.74720  |
| C  | 5.37790  | 2.87690  | 0.69300  |
| C  | 4.00470  | 3.10170  | 0.52130  |
| C  | 3.48080  | 4.40140  | 0.46470  |
| C  | 2.10660  | 4.62660  | 0.29610  |
| C  | 1.58340  | 5.92570  | 0.24170  |
| C  | 0.21230  | 6.13430  | 0.07530  |
| H  | -2.44200 | 6.25500  | -0.24860 |
| H  | -0.16620 | 7.15280  | 0.03690  |
| H  | -4.71720 | 5.35340  | -0.53240 |
| H  | -6.23370 | 3.43510  | -0.73070 |
| H  | -6.59490 | 0.99870  | -0.79480 |
| H  | -6.95620 | -1.43420 | -0.85920 |
| H  | -6.06240 | -3.71930 | -0.77580 |
| H  | -4.14930 | -5.25300 | -0.56050 |
| H  | -2.23860 | -6.78600 | -0.34370 |
| H  | 0.17250  | -7.15110 | -0.05230 |
| H  | 2.44310  | -6.25230 | 0.23860  |
| H  | 4.71430  | -5.35400 | 0.53180  |
| H  | 6.23040  | -3.43470 | 0.74220  |
| H  | 6.59140  | -1.00260 | 0.81090  |
| H  | 6.95360  | 1.42930  | 0.88180  |
| H  | 6.06280  | 3.71640  | 0.78590  |
| H  | 4.15330  | 5.25120  | 0.55440  |
| H  | 2.24240  | 6.78630  | 0.32930  |
| Au | 0.03903  | 0.63764  | 3.47540  |
| Cl | 1.43124  | 2.46427  | 3.72285  |

|   |          |          |         |
|---|----------|----------|---------|
| N | -2.51177 | -0.93793 | 3.07682 |
| N | -0.81190 | -2.25689 | 3.26957 |
| C | -1.15865 | -0.93585 | 3.26256 |
| C | -2.99712 | -2.23174 | 2.97288 |
| C | -1.92479 | -3.06374 | 3.09460 |
| C | -3.33882 | 0.26191  | 3.03813 |
| C | 0.54358  | -2.75004 | 3.48075 |
| H | -4.04100 | -2.44560 | 2.78388 |
| H | 1.24170  | -1.93519 | 3.26346 |
| H | 0.67470  | -3.07038 | 4.52224 |
| H | -1.85475 | -4.14187 | 3.03255 |
| H | 0.73755  | -3.59015 | 2.80490 |
| H | -4.08145 | 0.17079  | 2.23779 |
| H | -2.68750 | 1.11899  | 2.83881 |
| H | -3.84391 | 0.40748  | 4.00155 |

# **C<sub>9</sub>H<sub>24</sub> – IMeAuCl**

137

|   |          |          |          |
|---|----------|----------|----------|
| C | -0.00810 | -1.41020 | 0.00010  |
| C | -1.23410 | -0.71310 | 0.00060  |
| C | -1.24220 | 0.69820  | -0.00140 |
| C | -0.02460 | 1.40950  | -0.00140 |
| C | 1.19670  | 0.70780  | -0.00050 |
| C | 1.20480  | -0.69440 | -0.00080 |
| C | 2.42450  | -1.39070 | -0.00150 |
| C | 2.46000  | -2.79570 | -0.00290 |
| C | 1.24790  | -3.51160 | -0.00170 |
| C | 0.02080  | -2.82140 | 0.00030  |
| C | -1.24020 | -3.58850 | 0.00270  |
| C | -2.46630 | -2.89380 | 0.00480  |
| C | -2.45660 | -1.41800 | 0.00290  |
| C | -3.67860 | -0.72400 | 0.00280  |
| C | -3.68680 | 0.68110  | -0.00080 |
| C | -2.47290 | 1.38900  | -0.00280 |
| C | -2.49980 | 2.86460  | -0.00620 |
| C | -1.28220 | 3.57330  | -0.00490 |
| C | -0.01210 | 2.82090  | -0.00200 |
| C | 1.20670  | 3.52540  | 0.00070  |
| C | 2.42710  | 2.82370  | 0.00220  |
| C | 2.40800  | 1.41850  | 0.00070  |
| C | 3.70610  | 0.69880  | 0.00060  |
| C | 3.71410  | -0.65570 | -0.00110 |
| C | 5.00750  | -1.38840 | -0.00180 |
| C | 4.97830  | -2.80320 | -0.00410 |
| C | 3.75180  | -3.51700 | -0.00490 |
| C | 3.75070  | -4.92840 | -0.00770 |
| C | 2.47680  | -5.67600 | -0.00680 |
| C | 1.24840  | -4.98710 | -0.00300 |
| C | 0.02150  | -5.69540 | -0.00090 |

|   |          |          |          |
|---|----------|----------|----------|
| C | -1.21310 | -4.99730 | 0.00220  |
| C | -2.43520 | -5.70330 | 0.00400  |
| C | -3.66890 | -5.00440 | 0.00730  |
| C | -3.69030 | -3.59370 | 0.00780  |
| C | -4.92450 | -2.89370 | 0.00980  |
| C | -4.94580 | -1.47810 | 0.00700  |
| C | -6.16680 | -0.77410 | 0.00780  |
| C | -6.17530 | 0.70290  | 0.00210  |
| C | -4.96240 | 1.42070  | -0.00250 |
| C | -4.95780 | 2.83630  | -0.00790 |
| C | -3.73180 | 3.55050  | -0.00950 |
| C | -3.72700 | 4.96120  | -0.01320 |
| C | -2.50160 | 5.67420  | -0.01170 |
| C | -1.27140 | 4.98230  | -0.00680 |
| C | -0.04520 | 5.69470  | -0.00260 |
| C | 1.18990  | 5.00070  | 0.00200  |
| C | 2.41000  | 5.70400  | 0.00780  |
| C | 3.69260  | 4.97150  | 0.00970  |
| C | 3.71020  | 3.56030  | 0.00570  |
| C | 4.94500  | 2.86110  | 0.00520  |
| C | 4.99080  | 1.44680  | 0.00230  |
| C | 6.20860  | 0.74290  | 0.00180  |
| C | 6.21690  | -0.66990 | -0.00030 |
| C | 7.43340  | -1.37730 | -0.00090 |
| C | 7.40890  | -2.78720 | -0.00320 |
| C | 6.19930  | -3.51070 | -0.00530 |
| C | 6.17860  | -4.91950 | -0.00870 |
| C | 4.96900  | -5.62800 | -0.01050 |
| C | 4.94230  | -7.10140 | -0.01530 |
| C | 3.78200  | -7.78040 | -0.01460 |
| C | 2.48560  | -7.08040 | -0.00900 |
| C | 1.27260  | -7.78470 | -0.00630 |
| C | 0.03540  | -7.10830 | -0.00230 |
| C | -1.18880 | -7.80060 | -0.00080 |
| C | -2.41110 | -7.11150 | 0.00170  |
| C | -3.69120 | -7.84230 | 0.00000  |
| C | -4.85980 | -7.17990 | 0.00410  |
| C | -4.89020 | -5.70620 | 0.00940  |
| C | -6.10990 | -5.01080 | 0.01400  |
| C | -6.14550 | -3.60440 | 0.01380  |
| C | -7.36100 | -2.88650 | 0.01640  |
| C | -7.37800 | -1.48330 | 0.01320  |
| C | -8.64050 | -0.72220 | 0.01510  |
| C | -8.64820 | 0.62300  | 0.00910  |
| C | -7.39450 | 1.39820  | 0.00110  |
| C | -7.39400 | 2.80150  | -0.00620 |
| C | -6.18680 | 3.53300  | -0.01050 |
| C | -6.16790 | 4.93970  | -0.01620 |
| C | -4.95640 | 5.64890  | -0.01710 |
| C | -4.94310 | 7.12290  | -0.02090 |
| C | -3.78220 | 7.79860  | -0.01940 |
| C | -2.49400 | 7.08260  | -0.01370 |
| C | -1.27980 | 7.78580  | -0.00910 |



|    |          |          |          |
|----|----------|----------|----------|
| C  | -0.04780 | 7.10750  | -0.00250 |
| C  | 1.18110  | 7.79840  | 0.00500  |
| C  | 2.40220  | 7.10840  | 0.01060  |
| C  | 3.69020  | 7.82350  | 0.01960  |
| C  | 4.85850  | 7.15830  | 0.02110  |
| C  | 4.90260  | 5.68540  | 0.01410  |
| C  | 6.12040  | 4.99140  | 0.01260  |
| C  | 6.15760  | 3.58310  | 0.00800  |
| C  | 7.37570  | 2.87420  | 0.00640  |
| C  | 7.41660  | 1.46480  | 0.00340  |
| C  | 8.62450  | 0.75070  | 0.00260  |
| C  | 8.63290  | -0.64880 | 0.00060  |
| H  | 8.35350  | -3.33010 | -0.00340 |
| H  | 9.58920  | -1.16650 | 0.00020  |
| H  | 7.11730  | -5.47030 | -0.01020 |
| H  | 5.88930  | -7.62980 | -0.02030 |
| H  | 3.77850  | -8.86470 | -0.01900 |
| H  | 1.28980  | -8.87310 | -0.00770 |
| H  | -1.19090 | -8.88910 | -0.00200 |
| H  | -3.66850 | -8.92630 | -0.00640 |
| H  | -5.80160 | -7.71740 | 0.00100  |
| H  | -7.04250 | -5.57220 | 0.01660  |
| H  | -8.30480 | -3.42930 | 0.01990  |
| H  | -9.57220 | -1.27770 | 0.02220  |
| H  | -9.58600 | 1.16800  | 0.01150  |
| H  | -8.34390 | 3.33340  | -0.00760 |
| H  | -7.10690 | 5.49020  | -0.01870 |
| H  | -5.89110 | 7.64940  | -0.02450 |
| H  | -3.77190 | 8.88290  | -0.02200 |
| H  | -1.29450 | 8.87420  | -0.01010 |
| H  | 1.18560  | 8.88690  | 0.00640  |
| H  | 3.67370  | 8.90770  | 0.02610  |
| H  | 5.79900  | 7.69790  | 0.02850  |
| H  | 7.05250  | 5.55330  | 0.01520  |
| H  | 8.31370  | 3.42830  | 0.00800  |
| H  | 9.57470  | 1.27990  | 0.00360  |
| Au | -1.41810 | -0.97730 | 3.44380  |
| Cl | -3.41810 | -2.14870 | 3.52310  |
| N  | 0.47750  | 1.38230  | 3.32820  |
| N  | 1.56920  | -0.49120 | 3.34930  |
| C  | 0.29870  | 0.02340  | 3.37250  |
| C  | 1.82810  | 1.70620  | 3.28180  |
| C  | 2.51740  | 0.52330  | 3.29420  |
| C  | -0.60820 | 2.35800  | 3.38830  |
| C  | 1.88300  | -1.91560 | 3.43320  |
| H  | 2.17700  | 2.73240  | 3.20760  |
| H  | 0.98280  | -2.48170 | 3.15680  |
| H  | 2.69690  | -2.15490 | 2.73360  |
| H  | 3.58260  | 0.32000  | 3.23140  |
| H  | 2.17940  | -2.18070 | 4.46070  |
| H  | -0.71810 | 2.74410  | 4.41430  |
| H  | -1.53840 | 1.85630  | 3.08760  |
| H  | -0.39600 | 3.18640  | 2.69700  |

# C<sub>150</sub>H<sub>30</sub> – IMeAuCl

197

|   |          |          |          |
|---|----------|----------|----------|
| C | 0.81110  | 0.73810  | −0.61830 |
| C | 1.98010  | 1.54810  | −0.66480 |
| C | −0.45860 | 1.33770  | −0.57300 |
| C | 0.92780  | −0.66220 | −0.60970 |
| C | 1.86400  | 2.94830  | −0.66660 |
| C | −0.57620 | 2.75580  | −0.57270 |
| C | 3.24990  | 0.94780  | −0.70310 |
| C | −1.61220 | 0.53800  | −0.51800 |
| C | 2.21390  | −1.26950 | −0.64820 |
| C | −0.22620 | −1.46200 | −0.55730 |
| C | 3.36780  | −0.46960 | −0.69600 |
| C | 0.57820  | 3.55590  | −0.62000 |
| C | −1.49590 | −0.86210 | −0.51090 |
| C | 3.01960  | 3.74860  | −0.70640 |
| C | −1.84570 | 3.35620  | −0.51700 |
| C | 4.40470  | 1.74910  | −0.74390 |
| C | −2.89800 | 1.14560  | −0.46170 |
| C | 2.32990  | −2.66930 | −0.63480 |
| C | −0.10850 | −2.88040 | −0.54280 |
| C | 0.46160  | 4.95800  | −0.61230 |
| C | 4.28770  | 3.14810  | −0.74600 |
| C | −3.01390 | 2.54600  | −0.46150 |
| C | 4.63780  | −1.06990 | −0.73130 |
| C | −2.66450 | −1.67270 | −0.44820 |
| C | 1.16190  | −3.47960 | −0.58240 |
| C | 2.89850  | 5.16950  | −0.70200 |
| C | −1.96070 | 4.75780  | −0.51080 |
| C | 5.69100  | 1.13710  | −0.78140 |
| C | −4.05160 | 0.34530  | −0.40110 |
| C | 3.60100  | −3.26840 | −0.67130 |
| C | −1.26210 | −3.68050 | −0.48420 |
| C | 1.63510  | 5.76720  | −0.65510 |
| C | −0.80730 | 5.55670  | −0.55880 |
| C | 5.80580  | −0.25540 | −0.77520 |
| C | −3.93420 | −1.07260 | −0.39470 |
| C | 4.75260  | −2.46820 | −0.71970 |
| C | −2.54790 | −3.07330 | −0.43620 |
| C | 5.46260  | 3.96310  | −0.78650 |
| C | −4.28450 | 3.14580  | −0.40270 |
| C | 1.27730  | −4.88110 | −0.56730 |
| C | 4.06020  | 5.97420  | −0.74200 |
| C | −3.25020 | 5.36340  | −0.45220 |
| C | 6.85130  | 1.94270  | −0.82310 |
| C | −5.32160 | 0.94660  | −0.34320 |

|   |          |          |          |
|---|----------|----------|----------|
| C | 3.71500  | -4.68930 | -0.65780 |
| C | -1.14500 | -5.08160 | -0.46890 |
| C | 1.51830  | 7.17600  | -0.64760 |
| C | -0.92460 | 6.98260  | -0.55060 |
| C | 5.34460  | 5.36230  | -0.78560 |
| C | -4.39820 | 4.56710  | -0.39940 |
| C | 6.73050  | 3.36100  | -0.82590 |
| C | -5.43640 | 2.34550  | -0.34450 |
| C | 7.08260  | -0.85900 | -0.81060 |
| C | -5.08780 | -1.87420 | -0.33170 |
| C | 6.04490  | -3.07870 | -0.75530 |
| C | -3.70280 | -3.87340 | -0.37360 |
| C | 2.56740  | -5.48610 | -0.60680 |
| C | 0.12420  | -5.67970 | -0.51180 |
| C | 0.23030  | 7.78040  | -0.59600 |
| C | 7.19630  | -2.27730 | -0.80120 |
| C | -4.97070 | -3.27290 | -0.32230 |
| C | 3.94140  | 7.37170  | -0.73680 |
| C | -3.36570 | 6.77250  | -0.44580 |
| C | 8.11720  | 1.34170  | -0.86010 |
| C | -6.48980 | 0.13150  | -0.28090 |
| C | 4.99270  | -5.29210 | -0.69500 |
| C | -2.31750 | -5.89040 | -0.40800 |
| C | 2.67210  | 7.97200  | -0.68960 |
| C | -2.19430 | 7.58000  | -0.49580 |
| C | 8.23250  | -0.05830 | -0.85400 |
| C | -6.37420 | -1.26190 | -0.27560 |
| C | 6.15890  | -4.47770 | -0.74420 |
| C | -3.58100 | -5.29370 | -0.36080 |
| C | 6.51030  | 6.16760  | -0.82560 |
| C | -5.67540 | 5.17030  | -0.34010 |
| C | 7.89400  | 4.17010  | -0.86670 |
| C | -6.72860 | 2.95650  | -0.28440 |
| C | 2.68380  | -6.89460 | -0.59240 |
| C | 0.24260  | -7.10520 | -0.49620 |
| C | 0.11180  | 9.19330  | -0.58820 |
| C | 7.75820  | 5.55470  | -0.86600 |
| C | -6.84190 | 4.35620  | -0.28340 |
| C | 8.47640  | -2.88410 | -0.83680 |
| C | -6.14480 | -4.08770 | -0.25820 |
| C | 1.51290  | -7.70240 | -0.53740 |
| C | 5.13560  | 8.18100  | -0.77870 |
| C | -4.63380 | 7.36830  | -0.38850 |
| C | 9.29430  | 2.17590  | -0.90240 |
| C | -7.76640 | 0.73570  | -0.22300 |
| C | 5.10580  | -6.68980 | -0.68190 |
| C | -2.19970 | -7.29910 | -0.39350 |
| C | 2.53840  | 9.40940  | -0.68240 |
| C | -2.30840 | 8.99300  | -0.48860 |
| C | 6.35460  | 7.59100  | -0.82130 |
| C | -5.78750 | 6.56810  | -0.33600 |
| C | 9.17150  | 3.52530  | -0.90540 |
| C | -7.88000 | 2.15480  | -0.22540 |

|   |           |           |          |
|---|-----------|-----------|----------|
| C | 9.53060   | -0.68760  | -0.88990 |
| C | -7.53410  | -2.06750  | -0.21270 |
| C | 7.44090   | -5.08100  | -0.77990 |
| C | -4.74160  | -6.09830  | -0.29850 |
| C | 3.95250   | -7.49050  | -0.63070 |
| C | -0.91150  | -7.90300  | -0.43870 |
| C | 1.30910   | 9.97730   | -0.63420 |
| C | -1.15400  | 9.76790   | -0.53550 |
| C | 9.63060   | -2.03860  | -0.88140 |
| C | -7.41240  | -3.48590  | -0.20500 |
| C | 8.57100   | -4.27180  | -0.82570 |
| C | -6.02620  | -5.48690  | -0.24770 |
| C | 4.96650   | 9.62940   | -0.77240 |
| C | -4.73730  | 8.80790   | -0.38350 |
| C | 10.59080  | 1.50900   | -0.93850 |
| C | -8.91570  | -0.06570  | -0.16210 |
| C | 6.41660   | -7.29230  | -0.71950 |
| C | -3.35270  | -8.09510  | -0.33340 |
| C | 1.62840   | -9.11540  | -0.52210 |
| C | 3.76410   | 10.19860  | -0.72790 |
| C | -3.61780  | 9.56980   | -0.43190 |
| C | -8.12340  | 4.95960   | -0.22420 |
| C | 10.69970  | 0.18270   | -0.93250 |
| C | -8.79960  | -1.46570  | -0.15710 |
| C | 7.52190   | -6.51030  | -0.76610 |
| C | -4.62240  | -7.49540  | -0.28590 |
| C | -7.09760  | 7.17080   | -0.27630 |
| C | -9.15960  | 2.76210   | -0.16670 |
| C | 4.05720   | -8.93010  | -0.61530 |
| C | -0.79170  | -9.31530  | -0.42370 |
| C | -8.20330  | 6.38930   | -0.22380 |
| C | -9.25320  | 4.15000   | -0.16790 |
| C | -8.57460  | -4.29510  | -0.14200 |
| C | -7.19110  | -6.29270  | -0.18480 |
| C | 2.93820   | -9.69240  | -0.56370 |
| C | 0.47430   | -9.89010  | -0.46620 |
| C | -6.07510  | 9.38550   | -0.32470 |
| C | -10.21300 | 0.56440   | -0.10410 |
| C | 6.48830   | -8.74860  | -0.70340 |
| C | -3.21800  | -9.53190  | -0.31980 |
| C | -7.16800  | 8.62750   | -0.27510 |
| C | -10.31300 | 1.91560   | -0.10730 |
| C | -9.97550  | -2.30030  | -0.09410 |
| C | -5.81570  | -8.30510  | -0.22270 |
| C | 5.39590   | -9.50750  | -0.65540 |
| C | -1.98830  | -10.09930 | -0.36360 |
| C | -8.43870  | -5.67940  | -0.13380 |
| C | -9.85160  | -3.64950  | -0.08800 |
| C | -7.03490  | -7.71590  | -0.17520 |
| C | -11.38120 | -0.30670  | -0.04300 |
| C | -4.44250  | -10.32140 | -0.25730 |
| C | -11.27110 | -1.63300  | -0.03840 |
| C | -5.64550  | -9.75360  | -0.21240 |

|    |           |           |          |
|----|-----------|-----------|----------|
| H  | 8.63980   | 6.16580   | -0.89570 |
| H  | 7.23970   | 8.19710   | -0.85210 |
| H  | 10.04950  | 4.14150   | -0.93500 |
| H  | 1.21490   | 11.04630  | -0.62940 |
| H  | -1.24230  | 10.83730  | -0.53050 |
| H  | 10.59800  | -2.50250  | -0.90530 |
| H  | 9.54110   | -4.72970  | -0.85010 |
| H  | 5.85340   | 10.23150  | -0.80520 |
| H  | 11.46570  | 2.12850   | -0.96780 |
| H  | 3.66580   | 11.26650  | -0.72440 |
| H  | -3.69990  | 10.63980  | -0.42820 |
| H  | 11.66450  | -0.28520  | -0.95660 |
| H  | 8.49490   | -6.96250  | -0.79160 |
| H  | -9.17530  | 6.84210   | -0.17990 |
| H  | -10.22250 | 4.60830   | -0.12370 |
| H  | 3.02100   | -10.76230 | -0.55170 |
| H  | 0.56320   | -10.95940 | -0.45450 |
| H  | -6.15300  | 10.45520  | -0.32300 |
| H  | 7.46230   | -9.19670  | -0.73050 |
| H  | -8.14130  | 9.07620   | -0.23270 |
| H  | -11.27980 | 2.37940   | -0.06420 |
| H  | 5.47450   | -10.57700 | -0.64350 |
| H  | -1.89320  | -11.16820 | -0.35300 |
| H  | -9.31950  | -6.29060  | -0.08650 |
| H  | -10.72890 | -4.26570  | -0.04130 |
| H  | -7.91920  | -8.32210  | -0.12830 |
| H  | -12.34570 | 0.16060   | -0.00150 |
| H  | -4.34320  | -11.38930 | -0.24830 |
| H  | -12.14550 | -2.25250  | 0.00690  |
| H  | -6.53160  | -10.35600 | -0.16670 |
| Au | 1.81810   | -0.38990  | 2.89470  |
| Cl | 3.93710   | -1.30690  | 2.81020  |
| N  | -0.34500  | 1.72360   | 2.92560  |
| N  | -1.20020  | -0.25650  | 3.04960  |
| C  | -0.00600  | 0.40090   | 2.96240  |
| C  | -1.72010  | 1.88610   | 2.98840  |
| C  | -2.25930  | 0.63720   | 3.06670  |
| C  | 0.61570   | 2.81920   | 2.87960  |
| C  | -1.33680  | -1.70340  | 3.16470  |
| H  | -2.19180  | 2.85890   | 2.93970  |
| H  | -0.40340  | -2.16290  | 2.82400  |
| H  | -1.51990  | -1.98680  | 4.20900  |
| H  | -3.29130  | 0.31280   | 3.10000  |
| H  | -2.16640  | -2.04510  | 2.53600  |
| H  | 0.28510   | 3.56920   | 2.15250  |
| H  | 1.58370   | 2.41040   | 2.57250  |
| H  | 0.71450   | 3.27980   | 3.87080  |

## Cartesian Coordinates of rigid C<sub>37</sub>H<sub>16</sub> and IMeAuCl structures used in Figures 2 and 3

### C<sub>37</sub>H<sub>16</sub>

53

|   |          |          |          |
|---|----------|----------|----------|
| C | 0.00000  | 0.00000  | 0.00000  |
| C | 0.00000  | 0.00000  | 1.42360  |
| C | 1.23280  | 0.00000  | -0.71180 |
| C | 1.23280  | 0.00000  | 2.13540  |
| C | -1.23800 | 0.00000  | 2.13840  |
| C | -1.23800 | 0.00000  | -0.71480 |
| C | 2.46570  | 0.00000  | 0.00000  |
| C | 1.23280  | 0.00000  | -2.14130 |
| C | 2.46560  | 0.00000  | 1.42350  |
| C | 1.23280  | 0.00000  | 3.56490  |
| C | -1.23660 | 0.00000  | 3.56260  |
| C | -2.47070 | 0.00000  | 1.42490  |
| C | -1.23660 | 0.00000  | -2.13910 |
| C | -2.47070 | 0.00000  | -0.00140 |
| C | 3.70370  | 0.00000  | -0.71480 |
| C | -0.00140 | 0.00000  | -2.85220 |
| C | 2.46700  | 0.00000  | -2.85220 |
| C | 3.70370  | 0.00000  | 2.13830  |
| C | -0.00140 | 0.00000  | 4.27580  |
| C | 2.46700  | 0.00000  | 4.27580  |
| C | -2.48180 | 0.00000  | 4.27550  |
| C | -3.71070 | 0.00000  | 2.14690  |
| C | -2.48180 | 0.00000  | -2.85190 |
| C | -3.71070 | 0.00000  | -0.72340 |
| C | 4.93650  | 0.00000  | -0.00140 |
| C | 3.70230  | 0.00000  | -2.13910 |
| C | 0.00390  | 0.00000  | -4.28710 |
| C | 2.46170  | 0.00000  | -4.28710 |
| C | 4.93650  | 0.00000  | 1.42490  |
| C | 3.70230  | 0.00000  | 3.56260  |
| H | -0.00170 | -0.86310 | 4.90820  |
| H | -0.00170 | 0.86310  | 4.90820  |
| H | 2.46760  | 0.00000  | 5.34580  |
| C | -3.68710 | 0.00000  | 3.55230  |
| H | -2.49280 | 0.00000  | 5.34540  |
| C | -4.93570 | 0.00000  | 1.39700  |
| C | -3.68710 | 0.00000  | -2.12870 |
| C | -2.44480 | 0.00000  | -4.28770 |
| C | -4.93570 | 0.00000  | 0.02660  |
| H | 5.86330  | 0.00000  | -0.53580 |
| H | 4.62860  | 0.00000  | -2.67450 |
| C | 1.23280  | 0.00000  | -4.96930 |
| C | -1.25800 | 0.00000  | -4.97290 |

|   |          |         |          |
|---|----------|---------|----------|
| H | 3.38280  | 0.00000 | -4.83160 |
| H | 5.86330  | 0.00000 | 1.95940  |
| H | 4.62860  | 0.00000 | 4.09810  |
| H | -4.63470 | 0.00000 | 4.09940  |
| H | -5.88030 | 0.00000 | 1.94740  |
| H | -4.63470 | 0.00000 | -2.67590 |
| H | -3.39390 | 0.00000 | -4.83060 |
| H | -5.88030 | 0.00000 | -0.52390 |
| H | 1.23290  | 0.00000 | -6.06350 |
| H | -1.25360 | 0.00000 | -6.06630 |

## IMeAuCl

17

|    |          |         |          |
|----|----------|---------|----------|
| N  | 0.94150  | 3.52220 | 0.49390  |
| C  | -0.14680 | 3.49010 | -0.33050 |
| N  | -1.21840 | 3.51660 | 0.51580  |
| C  | 0.55640  | 3.57440 | 1.82360  |
| C  | -0.80670 | 3.57090 | 1.83740  |
| C  | 2.32340  | 3.54500 | 0.03010  |
| Au | -0.16700 | 3.45560 | -2.31800 |
| C  | -2.60930 | 3.53190 | 0.07970  |
| H  | 1.27450  | 3.57010 | 2.63330  |
| H  | -1.50820 | 3.56240 | 2.66150  |
| H  | 2.93840  | 2.91620 | 0.68310  |
| H  | 2.70820  | 4.57280 | 0.02860  |
| H  | 2.34880  | 3.14810 | -0.98990 |
| Cl | -0.18180 | 3.31530 | -4.62260 |
| H  | -3.20780 | 2.89900 | 0.74390  |
| H  | -2.99980 | 4.55760 | 0.08700  |
| H  | -2.65250 | 3.13620 | -0.94000 |
